# Supplementary material for: Analysis of the process of representing clinical statements for decision-support applications: a comparison of openEHR archetypes and HL7 virtual medical record
Source: Springer Nature journal article supplement (doi:10.1007/s10916-016-0524-3), 2016-05-21
Supplement: MOESM1 [file 10188398]

Article title: Analysis of the process of representing clinical statements for decision-support applications: a comparison of openEHR archetypes and HL7 virtual medical record

Autor names: A. González-Ferrer, M. Peleg, M. Marcos, J.A. Maldonado

Corresponding Author:

Arturo González-Ferrer

Fundación de Investigación Biomédica, Hospital Clínico San Carlos

C/ Prof. Martín Lagos, S/N 28040, Madrid, Spain

E-mail: [arturogf@gmail.com](mailto:arturogf@gmail.com)

Phone number: +34 913303735

# APPENDIX A

Up to 117 statements from two guidelines were mapped to EHRs in the development of MobiGuide. Below, an overview of the vMR class used for the mapping.

**GESTATIONAL DIABETES GUIDELINE**

ObservationProposal  2

ObservationResult  58

ProcedureEvent  13

ProcedureOrder  8

ProcedureProposal  10

UndeliveredProcedure  6

TOTAL : 97

**ATRIAL FIBRILATION GUIDELINE**

EncounterEvent  1

ObservationOrder  3

ObservationResult  9

Problem  3

ProcedureEvent  1

ProcedureOrder  1

SubstanceAdministrationOrder  2

Total :20
